# Supplementary material
Source: publisher figshare collection journal article supplement (https://gsajournals.figshare.com/ndownloader/files/26673383)
Supplement: Supplementary file 1 [file 26673383]

## Sheet: Sheet1
Supplementary Table S4. Biological processes of gene ontology regulated by the differentially expressed miRNAs.
Biological process	E. camaldulensis	E. grandis x urophylla
GO:0006355~regulation of transcription, DNA-templated	0	88
GO:0006952~defense response	0	47
GO:0016567~protein ubiquitination	0	16
GO:0006412~translation	0	13
GO:0006635~fatty acid beta-oxidation	9	12
GO:0009809~lignin biosynthetic process	20	11
GO:0009658~chloroplast organization	0	11
GO:0009909~regulation of flower development	8	10
GO:0009867~jasmonic acid mediated signaling pathway	0	9
GO:0006612~protein targeting to membrane	0	8
GO:0015716~organic phosphonate transport	0	6
GO:0098655~cation transmembrane transport	0	6
GO:0000911~cytokinesis by cell plate formation	0	5
GO:0006436~tryptophanyl-tRNA aminoacylation	0	5
GO:0009790~embryo development	0	5
GO:0010051~xylem and phloem pattern formation	0	5
GO:0009863~salicylic acid mediated signaling pathway	0	4
GO:0010020~chloroplast fission	0	4
GO:0006561~proline biosynthetic process	0	3
GO:0006950~response to stress	0	3
GO:0010043~response to zinc ion	0	3
GO:0010817~regulation of hormone levels	0	3
GO:0016070~RNA metabolic process	0	3
GO:0016458~gene silencing	0	3
GO:0071229~cellular response to acid chemical	0	3
GO:0007129~synapsis	0	2
GO:0009306~protein secretion	0	2
GO:0009611~response to wounding	0	2
GO:0009629~response to gravity	0	2
GO:0010089~xylem development	0	2
GO:0010411~xyloglucan metabolic process	0	2
GO:0019375~galactolipid biosynthetic process	0	2
GO:0034605~cellular response to heat	0	2
GO:0034641~cellular nitrogen compound metabolic process	0	2
GO:0048653~anther development	0	2
GO:0070588~calcium ion transmembrane transport	0	2
GO:0006887~exocytosis	3	1
GO:0000041~transition metal ion transport	0	1
GO:0000244~spliceosomal tri-snRNP complex assembly	0	1
GO:0000453~enzyme-directed rRNA 2'-O-methylation	0	1
GO:0006084~acetyl-CoA metabolic process	0	1
GO:0006139~nucleobase-containing compound metabolic process	0	1
GO:0006535~cysteine biosynthetic process from serine	0	1
GO:0006821~chloride transport	0	1
GO:0008356~asymmetric cell division	0	1
GO:0009094~L-phenylalanine biosynthetic process	0	1
GO:0009097~isoleucine biosynthetic process	0	1
GO:0009725~response to hormone	0	1
GO:0010507~negative regulation of autophagy	0	1
GO:0010584~pollen exine formation	0	1
GO:0010928~regulation of auxin mediated signaling pathway	0	1
GO:0019538~protein metabolic process	0	1
GO:0030433~ER-associated ubiquitin-dependent protein catabolic process	0	1
GO:0031222~arabinan catabolic process	0	1
GO:0043647~inositol phosphate metabolic process	0	1
GO:0045491~xylan metabolic process	0	1
GO:0048194~Golgi vesicle budding	0	1
GO:0048263~determination of dorsal identity	0	1
GO:0048364~root development	0	1
GO:1903830~magnesium ion transmembrane transport	0	1
GO:0008152~metabolic process	111	0
GO:0016310~phosphorylation	12	0
GO:0009744~response to sucrose	9	0
GO:0010218~response to far red light	9	0
GO:0016558~protein import into peroxisome matrix	9	0
GO:0006810~transport	8	0
GO:0015748~organophosphate ester transport	8	0
GO:0006470~protein dephosphorylation	6	0
GO:0010075~regulation of meristem growth	5	0
GO:0009738~abscisic acid-activated signaling pathway	4	0
GO:0009813~flavonoid biosynthetic process	4	0
GO:0016132~brassinosteroid biosynthetic process	4	0
GO:0046854~phosphatidylinositol phosphorylation	4	0
GO:0006342~chromatin silencing	3	0
GO:0006511~ubiquitin-dependent protein catabolic process	3	0
GO:0006913~nucleocytoplasmic transport	3	0
GO:0009958~positive gravitropism	3	0
GO:0045036~protein targeting to chloroplast	3	0
GO:0052696~flavonoid glucuronidation	3	0
GO:0071805~potassium ion transmembrane transport	3	0
GO:1901700~response to oxygen-containing compound	3	0
GO:0006094~gluconeogenesis	2	0
GO:0006633~fatty acid biosynthetic process	2	0
GO:0006972~hyperosmotic response	2	0
GO:0009060~aerobic respiration	2	0
GO:0010245~radial microtubular system formation	2	0
GO:0019219~regulation of nucleobase-containing compound metabolic process	2	0
GO:0032880~regulation of protein localization	2	0
GO:0043486~histone exchange	2	0
GO:0046474~glycerophospholipid biosynthetic process	2	0
GO:0048589~developmental growth	2	0
GO:0048827~phyllome development	2	0
GO:0051567~histone H3-K9 methylation	2	0
GO:0000394~RNA splicing, via endonucleolytic cleavage and ligation	1	0
GO:0001682~tRNA 5'-leader removal	1	0
GO:0006007~glucose catabolic process	1	0
GO:0006275~regulation of DNA replication	1	0
GO:0006464~cellular protein modification process	1	0
GO:0008284~positive regulation of cell proliferation	1	0
GO:0009103~lipopolysaccharide biosynthetic process	1	0
GO:0009664~plant-type cell wall organization	1	0
GO:0010143~cutin biosynthetic process	1	0
GO:0010375~stomatal complex patterning	1	0
GO:0015853~adenine transport	1	0
GO:0016569~covalent chromatin modification	1	0
GO:0019222~regulation of metabolic process	1	0
GO:0030307~positive regulation of cell growth	1	0
GO:0034475~U4 snRNA 3'-end processing	1	0
GO:0042752~regulation of circadian rhythm	1	0
GO:0044036~cell wall macromolecule metabolic process	1	0
GO:0045176~apical protein localization	1	0
GO:0045489~pectin biosynthetic process	1	0
GO:0048831~regulation of shoot system development	1	0
GO:0070918~production of small RNA involved in gene silencing by RNA	1	0
GO:0071897~DNA biosynthetic process	1	0
GO:0090304~nucleic acid metabolic process	1	0
GO:0090558~plant epidermis development	1	0
GO:2000123~positive regulation of stomatal complex development	1	0
